# Supplementary material for: Oxygen vacancies on TiO2 promoted the activity and stability of supported Pd nanoparticles for the oxygen reduction reaction
Source: Royal Society of Chemistry journal article supplement (doi:10.1039/c7ta09831f), 2017-12-29
Supplement: c7ta09831f1.pdf [file c7ta09831f1.pdf]

## Supporting Information

# Oxygen Vacancy on TiO<sub>2</sub> Promoted the Activity and Stability of Supported Pd Nanoparticles for Oxygen Reduction Reaction

*Jing Li,<sup>a,b</sup> Hu Zhou,<sup>a</sup> Han Zhuo,<sup>a</sup> Zhongzhe Wei,<sup>a</sup> Guilin Zhuang,<sup>a</sup> Xing Zhong,<sup>a</sup>*

*Shengwei Deng,<sup>a</sup> and Jianguo Wang<sup>a,\*</sup>*

a. Institute of Industrial Catalysis, College of Chemical Engineering, Zhejiang

University of Technology, Hangzhou, 310032, PR China

b. College of Chemistry & Chemical Engineering, Binzhou University, Binzhou,

256603, PR China

E-mail: jgw@zjut.edu.cn

# Experimental Section

## 1. Preparation of $\text{TiO}_2\text{-V}_\text{O}$ (700) and $\text{TiO}_2\text{-V}_\text{O}$ (900)

The as-prepared  $\text{TiO}_2(\text{B})$  nanosheets were annealed at 700 °C or 900 °C (heating rate of 2 °C min<sup>-1</sup>) for 3 h under flowing Ar atmosphere in a horizontal quartz tube furnace. The obtained samples at 700 °C and 900 °C were denoted as  $\text{TiO}_2\text{-V}_\text{O}$  (700) and  $\text{TiO}_2\text{-V}_\text{O}$  (900), respectively.

## 2. Preparation of 10 wt% Pd/ $\text{TiO}_2\text{-V}_\text{O}$ (700) and 10 wt% $\text{TiO}_2\text{-V}_\text{O}$ (900) catalysts

The 10 wt% Pd/  $\text{TiO}_2\text{-V}_\text{O}$  (700) catalyst was prepared by pyrolyzing a mixture of 11.6 mg  $\text{Pd}(\text{acac})_2$  and 40 mg  $\text{TiO}_2\text{-V}_\text{O}$  (700), followed by fully grounding the mixture in an agate mortar. Pyrolysis was carried out at 300 °C (heating rate of 3 °C min<sup>-1</sup>) for 3 h under flowing Ar gas. For comparison, 10 wt% Pd/ $\text{TiO}_2\text{-V}_\text{O}$  (900) was prepared as the same procedure above.

## 3. Preparation of 5 wt% Pd/ $\text{TiO}_2\text{-V}_\text{O}$ and 20 wt% $\text{TiO}_2\text{-V}_\text{O}$ catalysts

The 5 wt% Pd/ $\text{TiO}_2\text{-V}_\text{O}$  was prepared by pyrolyzing a mixture of 5.8 mg  $\text{Pd}(\text{acac})_2$  and 40 mg  $\text{TiO}_2\text{-V}_\text{O}$  obtained via Ar treatment at 800 °C, followed by fully grounding the mixture in an agate mortar. Pyrolysis was carried out at 300 °C (heating rate of 3 °C min<sup>-1</sup>) for 3 h under flowing Ar gas. For comparison, 20 wt% Pd/ $\text{TiO}_2\text{-V}_\text{O}$  was prepared as the same procedure above.

## Supplementary Results

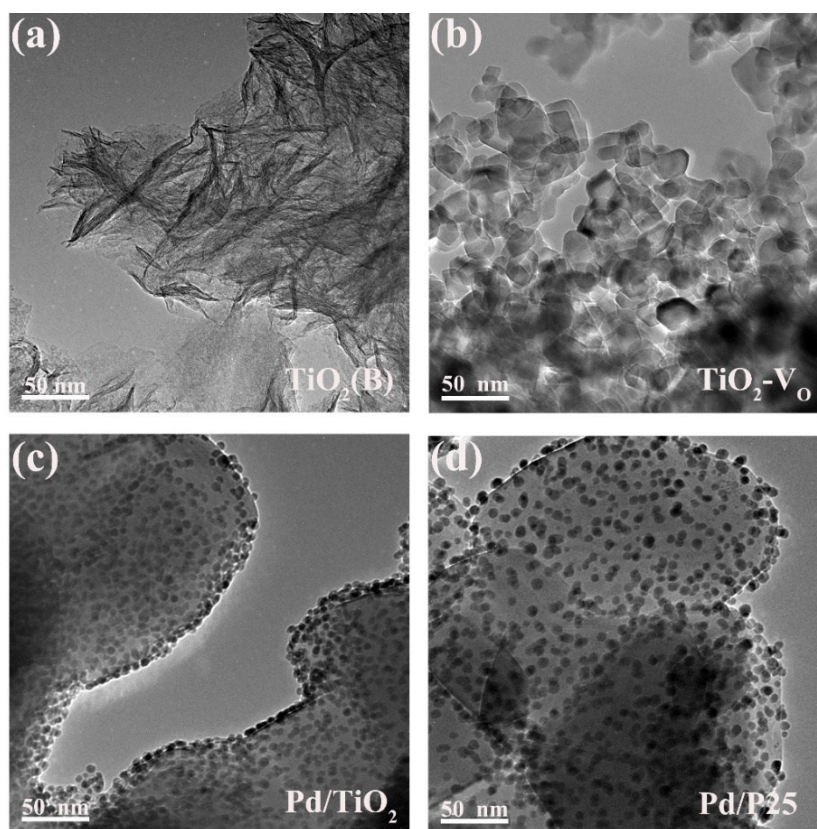

Fig. S1 TEM images of (a)  $\text{TiO}_2(\text{B})$ , (b)  $\text{TiO}_2\text{-V}_\text{o}$ , (c)  $\text{Pd/TiO}_2$  and (d)  $\text{Pd/P25}$  with scale bars of 50 nm.

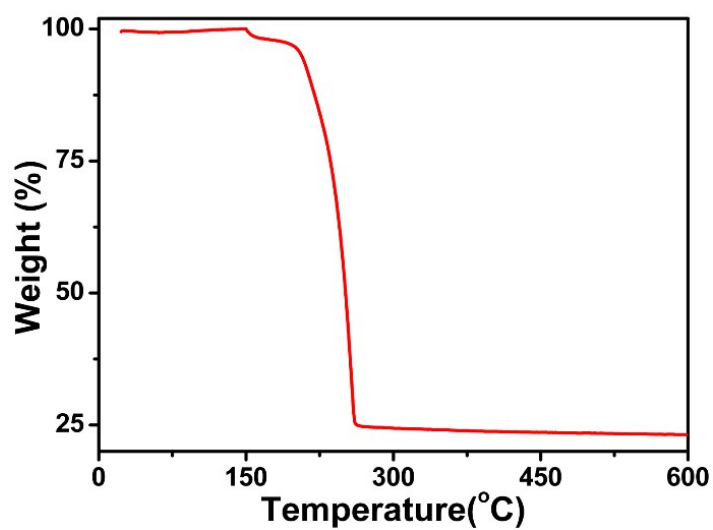

Fig. S2 TGA of  $\text{Pd}(\text{acac})_2$

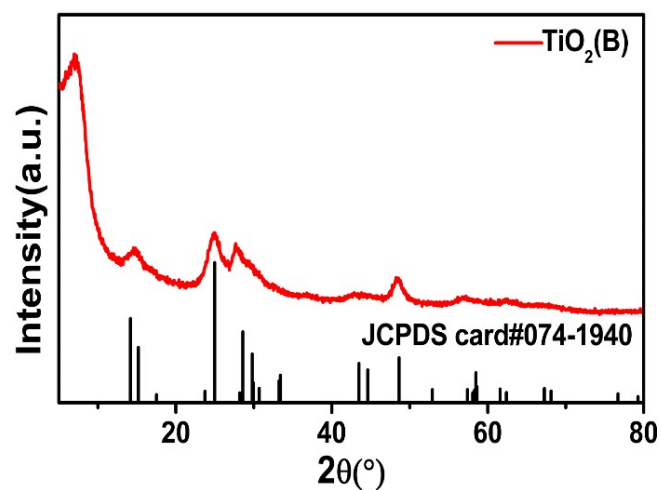

Fig. S3 XRD pattern of  $\text{TiO}_2(\text{B})$

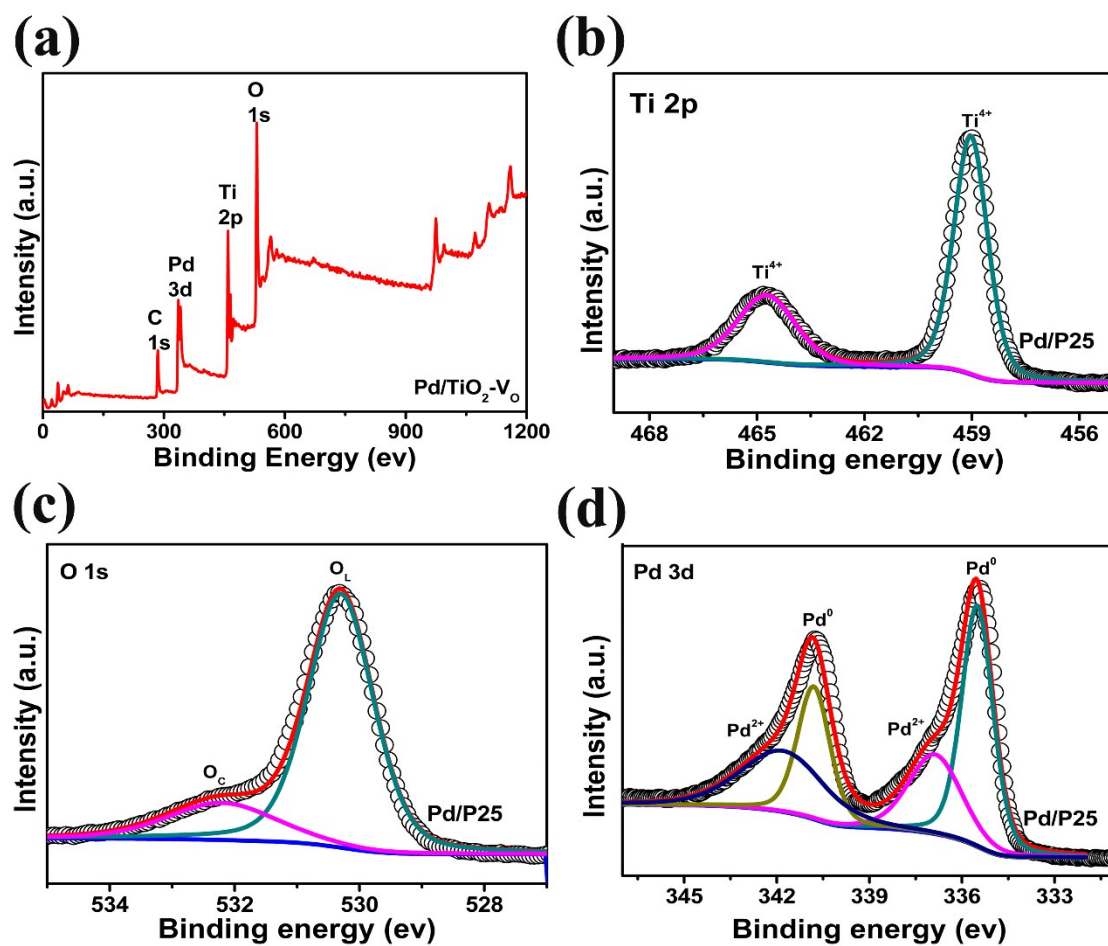

Fig. S4 XPS results of catalysts. (a) Survey spectrum of Pd/TiO<sub>2</sub>-V<sub>O</sub>; (b) Ti 2p, (c) O 1s and (d) Pd 3d XPS high-resolution spectra of Pd/P25.

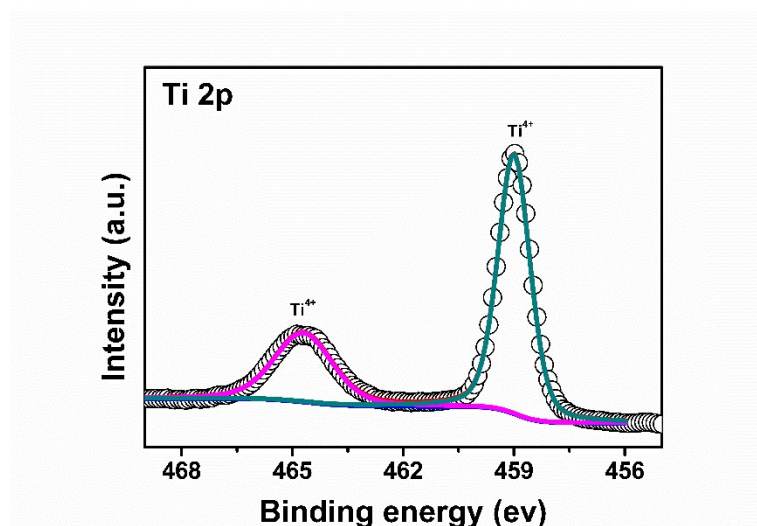

Fig. S5 XPS spectrum of Ti 2p for  $\text{TiO}_2\text{-V}_0$ .

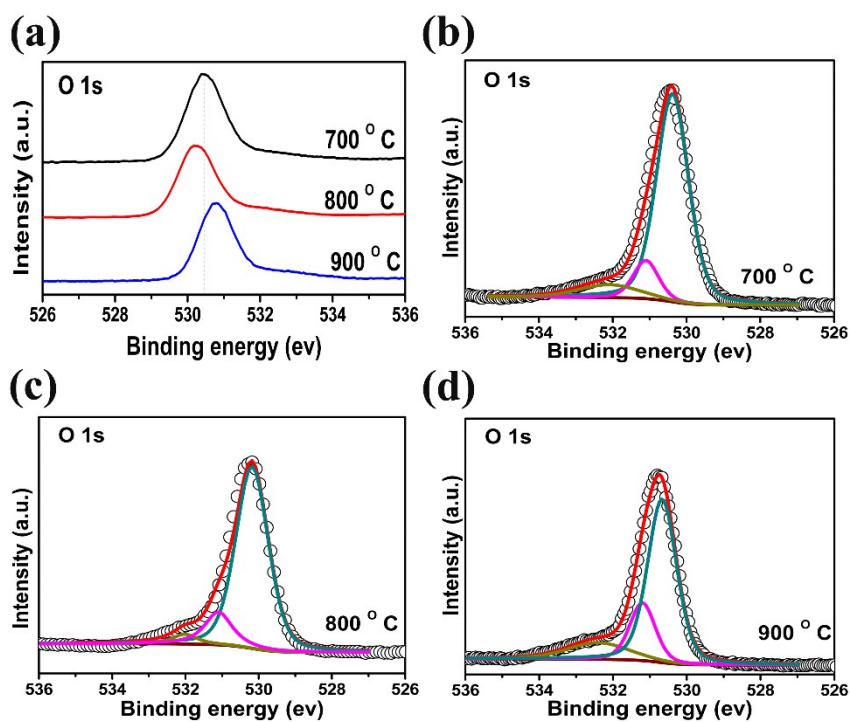

Fig. S6 O 1s high-resolution XPS spectra of  $\text{TiO}_2\text{-V}_0$  (700),  $\text{TiO}_2\text{-V}_0$  (800) and  $\text{TiO}_2\text{-V}_0$  (900).

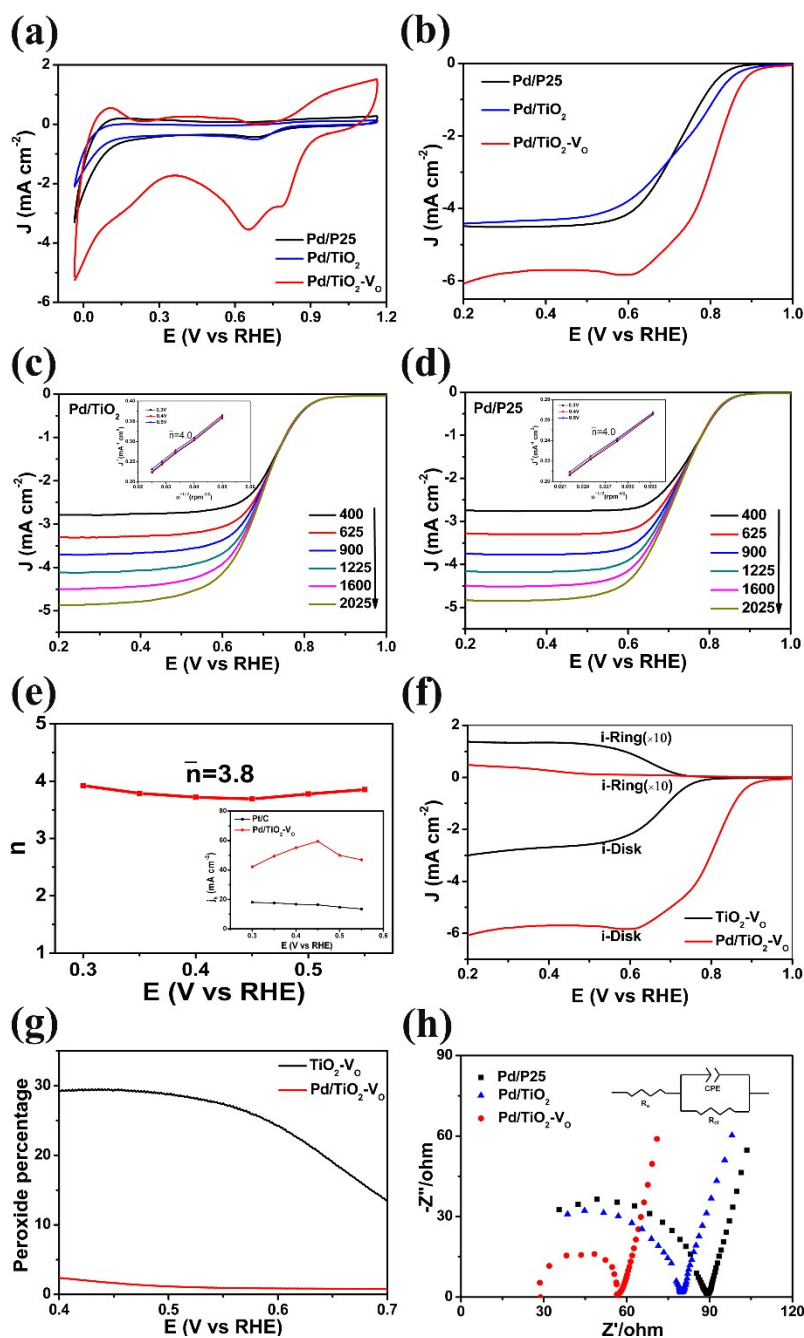

**Fig. S7** Electrochemical properties of catalysts. (a) Cyclic voltammetry curves of Pd/TiO<sub>2</sub>-V<sub>0</sub>, Pd/TiO<sub>2</sub> and Pd/P25 catalysts in O<sub>2</sub>-saturated 0.1 M KOH solution, scan rate 100 mV s<sup>-1</sup>. (b) Polarization curves of Pd/TiO<sub>2</sub>-V<sub>0</sub> and Pd/TiO<sub>2</sub>, Pd/P25, Pt/C catalysts, rotation speeds 1600 rpm, scan rate 20 mV s<sup>-1</sup>. LSV curves obtained at different rotation speeds (400-2025 rpm) in 0.1 M KOH solution for (c) Pd/TiO<sub>2</sub> and (d) Pd/P25. The insets in Fig. S5c and Fig. S5d show the Koutecky-Levich plots and the numbers of electron transfer calculated from K-L analysis for Pd/TiO<sub>2</sub> and Pd/P25, respectively. (e) Numbers of electron transfer calculated from K-L analysis of Pd/TiO<sub>2</sub>-V<sub>0</sub> (inset: calculated kinetic current densities on the electrodes of Pt/C and Pd/TiO<sub>2</sub>-V<sub>0</sub>). (f) RRDE measurements (1600 rpm) of TiO<sub>2</sub>-V<sub>0</sub> and Pd/TiO<sub>2</sub>-V<sub>0</sub>. (g) Peroxide percentage of TiO<sub>2</sub>-V<sub>0</sub> and Pd/TiO<sub>2</sub>-V<sub>0</sub>. (h) Nyquist plot of EIS for ORR on Pd/P25, Pd/TiO<sub>2</sub> and Pd/TiO<sub>2</sub>-V<sub>0</sub> electrodes in 0.1 M KOH at open circuit voltage (inset: the corresponding equivalent circuit diagram of Nyquist plot of Pd/TiO<sub>2</sub>-V<sub>0</sub>.  $R_s$ : an electrolyte resistance,  $R_{ct}$ : a charge transfer resistance, CPE: a constant phase element).

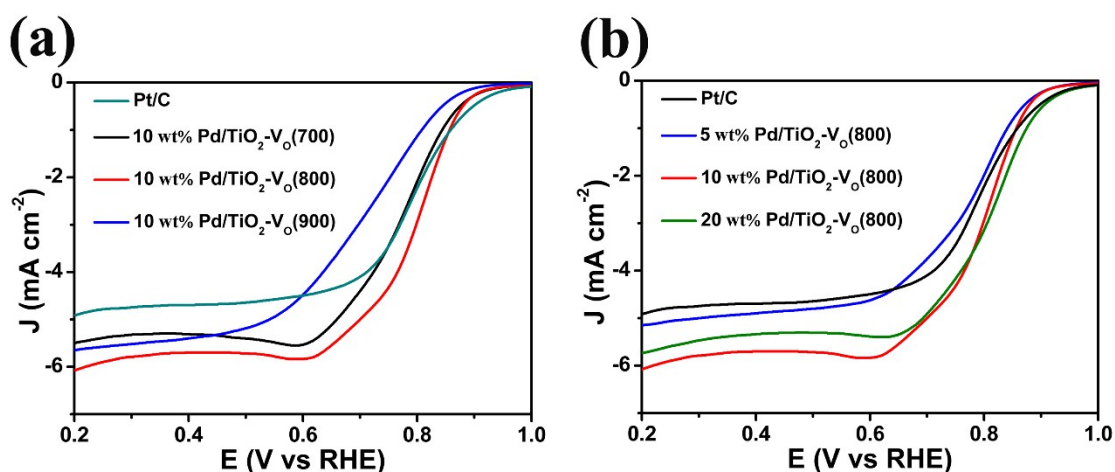

**Fig. S8** Polarization curves of different catalysts with rotation speed of 1600 rpm and scan rate of 20 mV s<sup>-1</sup> (a) Pt/C, 10 wt% Pd/TiO<sub>2</sub>-V<sub>O</sub> (700), 10 wt% Pd/TiO<sub>2</sub>-V<sub>O</sub> (800) and 10 wt% Pd/TiO<sub>2</sub>-V<sub>O</sub> (900). (b) Pt/C, 5 wt% Pd/TiO<sub>2</sub>-V<sub>O</sub> (800), 10 wt% Pd/TiO<sub>2</sub>-V<sub>O</sub> (800) and 20 wt% Pd/TiO<sub>2</sub>-V<sub>O</sub> (800).

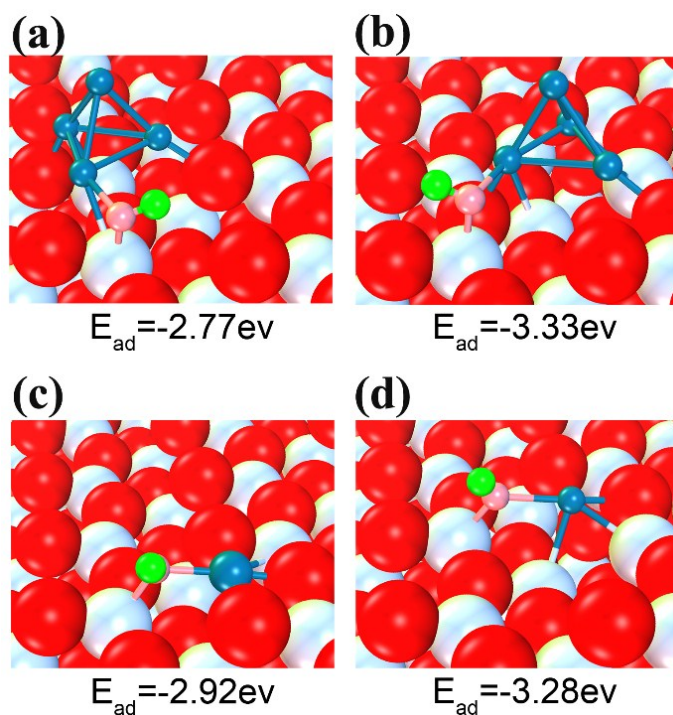

**Fig. S9** Optimized structures and adsorption energies of OH adsorbed on (a) Pd<sub>4</sub>/TiO<sub>2</sub>, (b) Pd<sub>4</sub>/TiO<sub>2</sub>-V<sub>O</sub>, (c) Pd/TiO<sub>2</sub> and (d) Pd/TiO<sub>2</sub>-V<sub>O</sub>.



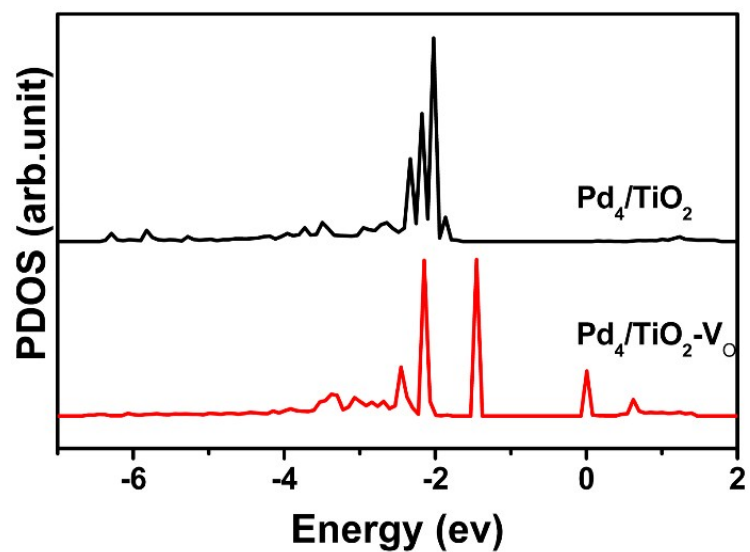

**Fig. S10** The PDOS of Pd<sub>4</sub> over TiO<sub>2</sub> and TiO<sub>2</sub>-V<sub>O</sub>.

**Table S1** V<sub>O</sub> content of TiO<sub>2</sub>-V<sub>O</sub> (700), TiO<sub>2</sub>-V<sub>O</sub> (800) and TiO<sub>2</sub>-V<sub>O</sub> (900) obtained from XPS analysis.

| sample                                 | V <sub>O</sub> content wt % |
|----------------------------------------|-----------------------------|
| TiO <sub>2</sub> -V <sub>O</sub> (700) | 12.4                        |
| TiO <sub>2</sub> -V <sub>O</sub> (800) | 14.6                        |
| TiO <sub>2</sub> -V <sub>O</sub> (900) | 19.8                        |

**Table S2** Pd content of Pd/P25, Pd/TiO<sub>2</sub> and Pd/TiO<sub>2</sub>-V<sub>O</sub> obtained from XPS analysis.

| sample                              | Pd content wt % |
|-------------------------------------|-----------------|
| Pd/P25                              | 9.56            |
| Pd/TiO <sub>2</sub>                 | 9.38            |
| Pd/TiO <sub>2</sub> -V <sub>O</sub> | 9.50            |



**Table S3** Comparison of the ORR activity in 0.1 M KOH of the 10 wt% Pd/TiO<sub>2</sub>-V<sub>O</sub> with that of some recently reported Pd-based catalysts.

| Catalyst                                           | Pd loading (wt %) | Support                          | Rotation speed (rpm) | Onset potential (v VS RHE) | Half-wave potential (v VS RHE) | Reference                                       |
|----------------------------------------------------|-------------------|----------------------------------|----------------------|----------------------------|--------------------------------|-------------------------------------------------|
| Pd/TiO <sub>2</sub> -V <sub>O</sub>                | 10                | TiO <sub>2</sub> -V <sub>O</sub> | 1600                 | 0.98                       | 0.83                           | This work                                       |
| Pd/TiO <sub>2</sub> -X                             | 25                | TiO <sub>2</sub> -X              | 2000                 | 0.94                       | 0.80                           | <i>ACS Appl. Mater. Interfaces</i> 2016,8,27654 |
| Pd/TiO <sub>2</sub> -X: N                          | 25                | TiO <sub>2</sub> -X: N           | 2000                 | 0.94                       | 0.81                           | <i>ACS Appl. Mater. Interfaces</i> 2016,8,27654 |
| Pd <sub>3</sub> Pb/TiO <sub>2</sub>                | 5                 | TiO <sub>2</sub>                 | <b>2500</b>          | 0.98                       | 0.85                           | <i>J. Appl. Electrochem.</i> (2016) 46:745      |
| Ni@Pd <sub>3</sub> /C                              | <b>17</b>         | C                                | 1600                 | 0.98                       | 0.86                           | <i>J. Mater. Chem. A</i> 2017, 5,9233           |
| Au <sub>10</sub> Pd <sub>40</sub> Co <sub>50</sub> | 46                | /                                | 1600                 | -                          | 0.83                           | <i>Nat. Commun.</i> 2014, <b>5</b> , 5185       |
